# Supplementary material for: Capacitive studies of electrodeposited PEDOT-maleimide
Source: Royal Society of Chemistry journal article supplement (doi:10.1039/d2ta00347c), 2022-01-01
Supplement: d2ta00347c1.pdf [file d2ta00347c1.pdf]

## Supporting Information

# Capacitive Studies of Electrodeposited PEDOT- maleimide

*Yuhang Wu,<sup>a</sup> Samadhan S. Nagane,<sup>a</sup> Peter Sitarik,<sup>a</sup> Shrirang Chhatre,<sup>a</sup> Junghyun Lee,<sup>a</sup> and  
David C. Martin<sup>a,b\*</sup>*

<sup>a</sup>Department of Materials Science and Engineering, University of Delaware, Newark, Delaware  
19716, United States

<sup>b</sup> Department of Biomedical Engineering, University of Delaware, Newark, Delaware, 19716,  
United States.

### **Corresponding Author**

\* Email-address: milty@udel.edu (David C. Martin)

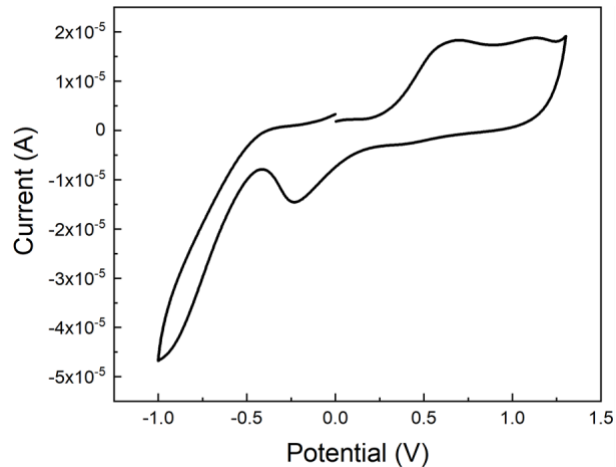

**Fig. S1** Staircase CV of monomer free 0.02 M lithium perchlorate acetonitrile solution at 100 mVs<sup>-1</sup>. The curve is the 5<sup>th</sup> cycle.

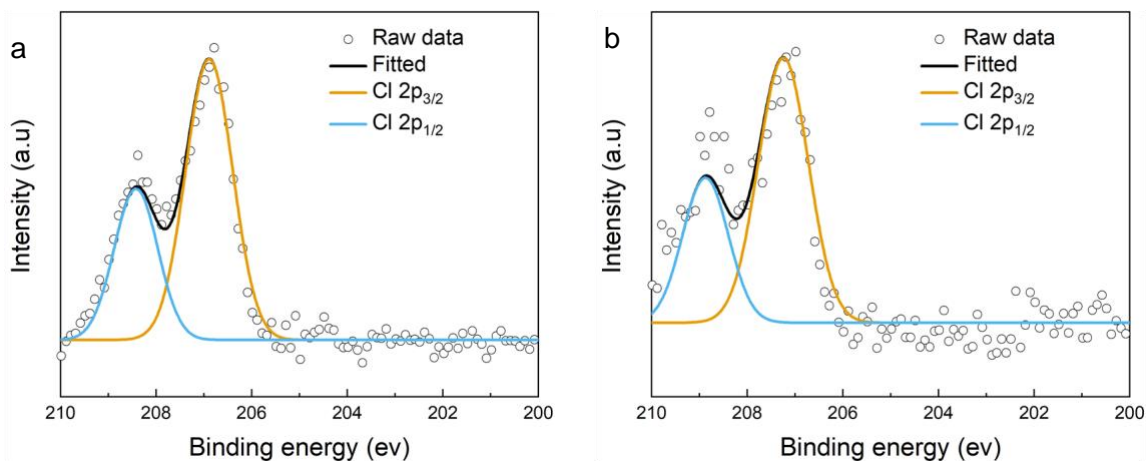

**Fig. S2** Cl 2p of (a) PEDOT and (b) PEDOT-maleimide.

**Table S1** Deconvoluted chlorine peak positions and doping levels of PEDOT and PEDOT-maleimide

| Sample          | Cl 2p <sub>3/2</sub> (eV) | Cl 2p <sub>1/2</sub> (eV) | Doping level |
|-----------------|---------------------------|---------------------------|--------------|
| PEDOT           | 206.9                     | 208.4                     | 0.20         |
| PEDOT-maleimide | 207.2                     | 208.7                     | 0.16         |

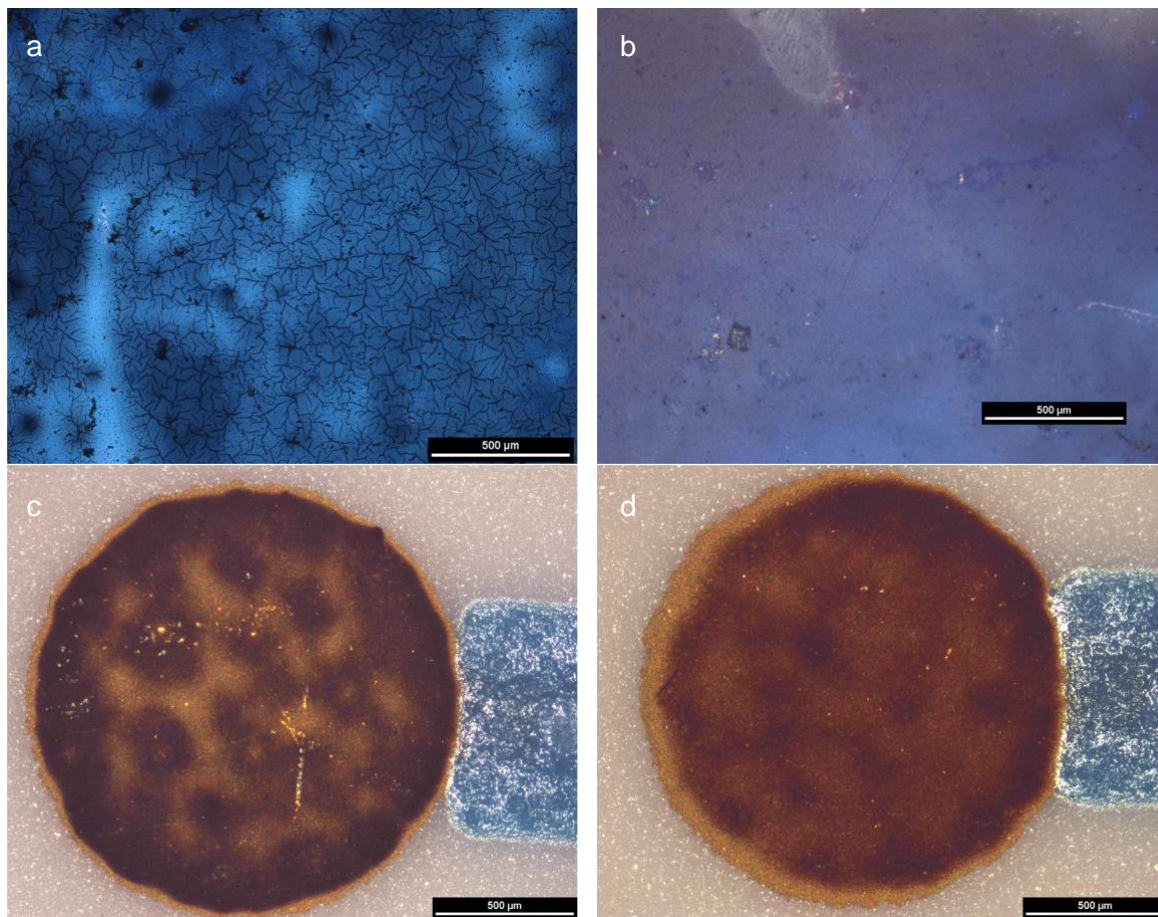

**Fig. S3** OM of (a) PEDOT and (b) PEDOT-maleimide ITO samples. OM of (c) PEDOT and (d) PEDOT-maleimide coated working electrodes of C223BT.

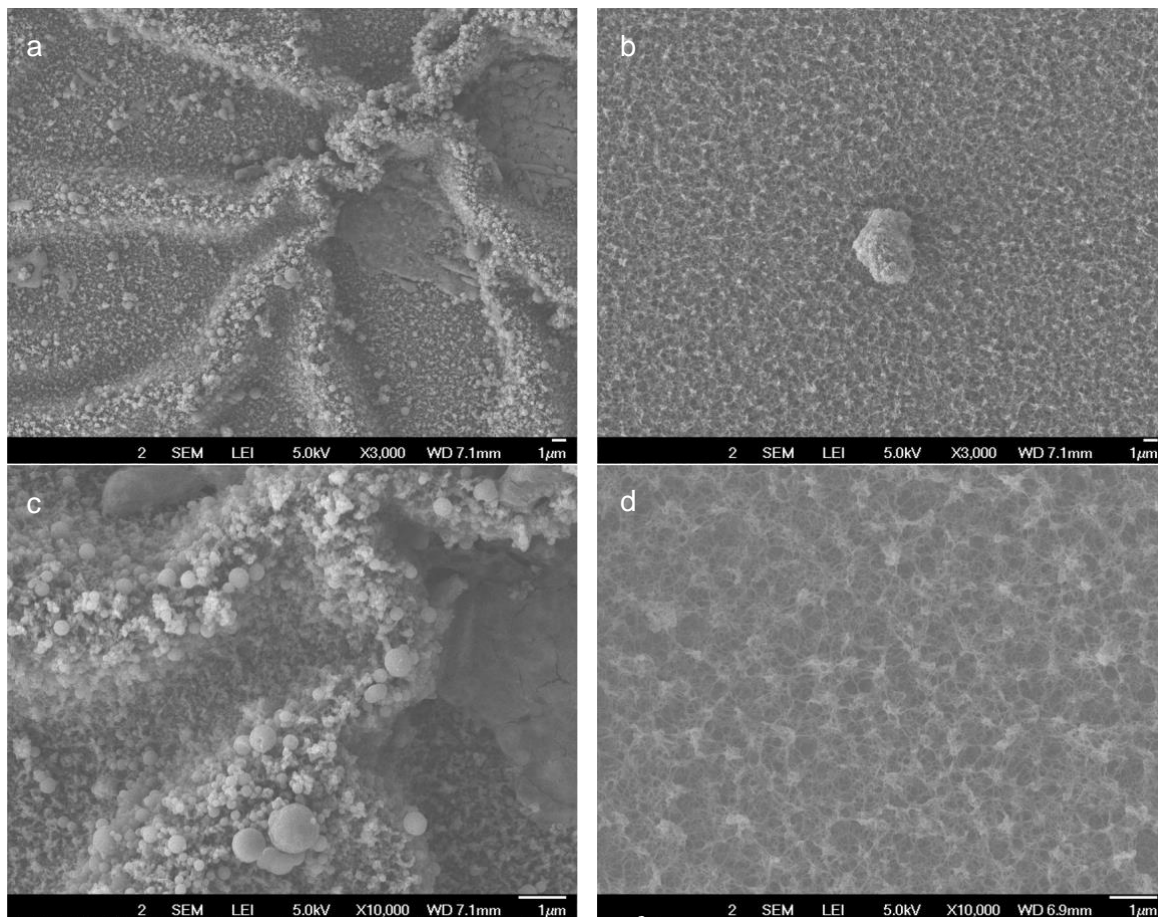

**Fig. S4** SEM of PEDOT at (a) low magnification, (c) high magnification and PEDOT-maleimide at (b) low magnification, (d) high magnification.

**Table S2** Thickness of PEDOT and PEDOT-maleimide coated ITO samples

| Thickness (nm) | PEDOT-1 | PEDOT-2 | PEDOT-3 | PEDOT-maleimide-1 | PEDOT-maleimide-2 | PEDOT-maleimide-3 |
|----------------|---------|---------|---------|-------------------|-------------------|-------------------|
| Line1          | 455.6   | 438.5   | 486.9   | 444.2             | 436.0             | 447.3             |
| Line2          | 470.8   | 410.7   | 466.1   | 438.7             | 437.6             | 435.1             |
| Line3          | 431.0   | 447.6   | 453.5   | 458.6             | 471.4             | 426.2             |
| Average        | 451.2   |         |         | 443.9             |                   |                   |
| Deviation      | 22.7    |         |         | 13.7              |                   |                   |

**Table S3** Resistance measured by the Keithley 2400 source meter and the converted sheet resistance

|                                  | PEDOT-1 | PEDOT-2 | PEDOT-3 | PEDOT-maleimide-1 | PEDOT-maleimide-2 | PEDOT-maleimide-3 |
|----------------------------------|---------|---------|---------|-------------------|-------------------|-------------------|
| $R_r$ ( $\Omega$ )               | 1.82E3  | 1.84E3  | 1.84E3  | 9.90E3            | 1.07E4            | 1.16E4            |
| Sheet resistance ( $\Omega$ /sq) | 6.60E3  | 6.67E3  | 6.67E3  | 3.59E4            | 3.87E4            | 4.20E4            |
| Average                          | 6.65E3  |         |         | 3.89E4            |                   |                   |
| Deviation                        | 4.04E1  |         |         | 3.05E3            |                   |                   |

**Table S4** Conductivities of PEDOT and PEDOT-maleimide coated ITO samples

| Conductivity ( $\text{Scm}^{-1}$ ) | PEDOT-1 | PEDOT-2 | PEDOT-3 | PEDOT-maleimide-1 | PEDOT-maleimide-2 | PEDOT-maleimide-3 |
|------------------------------------|---------|---------|---------|-------------------|-------------------|-------------------|
| Line1                              | 3.33    | 3.42    | 3.08    | 0.63              | 0.59              | 0.53              |
| Line2                              | 3.22    | 3.65    | 3.22    | 0.63              | 0.59              | 0.55              |
| Line3                              | 3.52    | 3.35    | 3.31    | 0.61              | 0.55              | 0.56              |
| Average                            | 3.34    |         |         | 0.58              |                   |                   |
| Deviation                          | 0.17    |         |         | 0.04              |                   |                   |

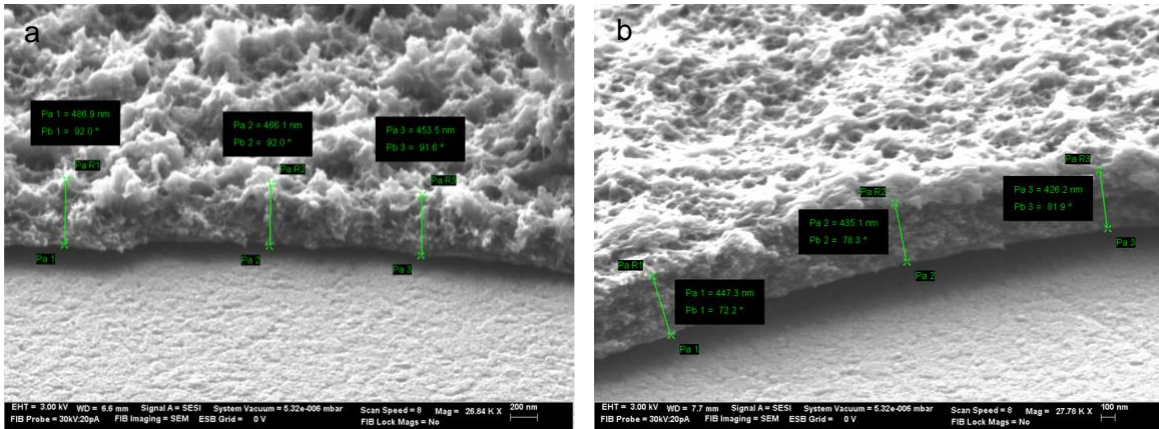

**Fig. S5** Representative Cross-section images of (a) PEDOT and (b) PEDOT-maleimide.

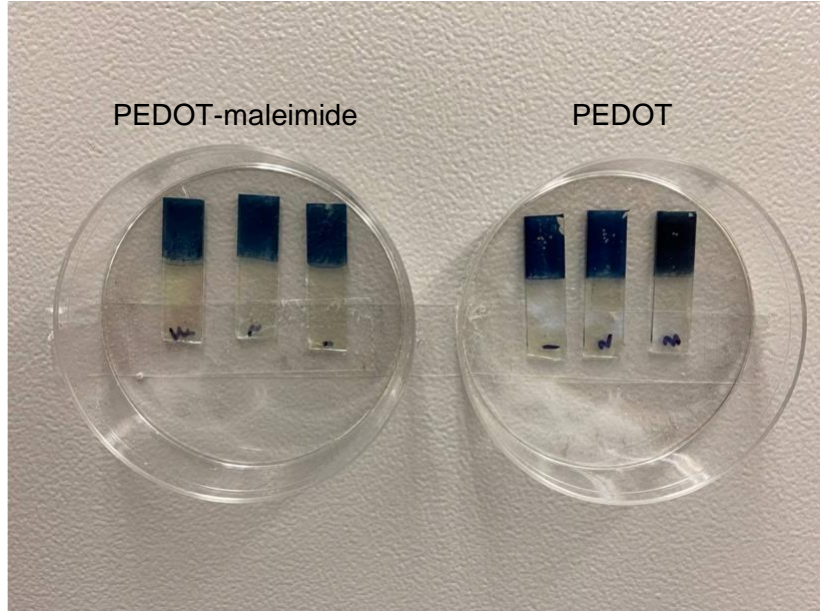

**Fig. S6** PEDOT and PEDOT-maleimide coated ITO samples after characterized by four-point probe.

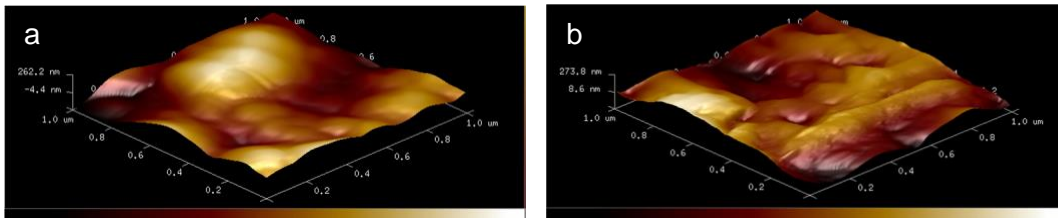

**Fig. S7** Topographies of  $1 \times 1 \mu\text{m}$  mapping areas for nanoindentation. (a) PEDOT and (b) PEDOT-maleimide.

**Table S5.** Results of Z-test: Two samples for means

| Sample                       | PEDOT  | PEDOT-maleimide |
|------------------------------|--------|-----------------|
| Mean                         | 1.75   | 4.54            |
| Known Variance               | 1.17   | 8.73            |
| Observations                 | 2154   | 1813            |
| Hypothesized Mean Difference | 0      |                 |
| z                            | -38.10 |                 |
| P( $Z \leq z$ ) one-tail     | 0.00   |                 |
| z Critical one-tail          | 1.64   |                 |
| P( $Z \leq z$ ) two-tail     | 0.00   |                 |
| z Critical two-tail          | 1.96   |                 |

**Table S6.** Results of F-test: Two samples for variances

| Sample                   | PEDOT | PEDOT-maleimide |
|--------------------------|-------|-----------------|
| Mean                     | 1.75  | 4.54            |
| Variance                 | 1.17  | 8.73            |
| Observations             | 2154  | 1813            |
| df                       | 2153  | 1812            |
| F                        | 0.13  |                 |
| P( $F \leq f$ ) one-tail | 0.00  |                 |
| F Critical one-tail      | 0.93  |                 |

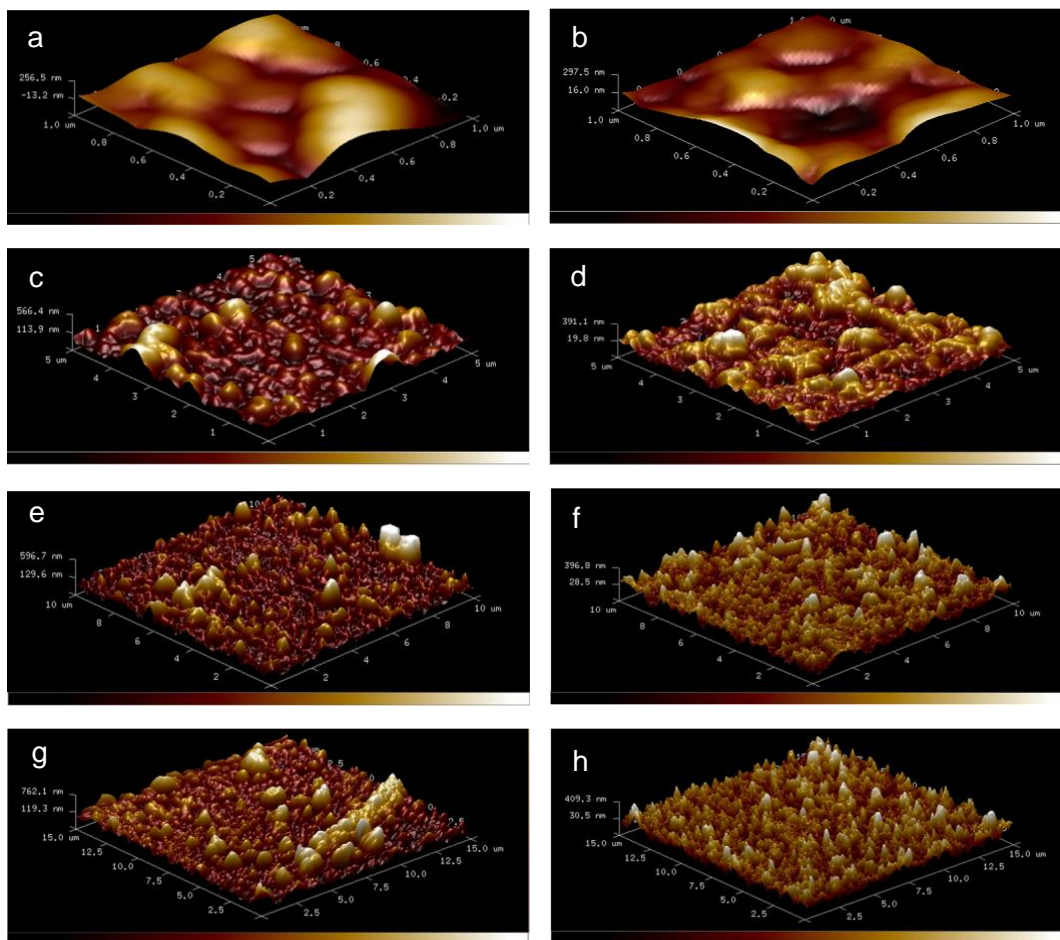

**Fig. S8** Topographies of PEDOT over (a) 1×1, (c) 5×5, (e) 10×10, and (g) 15×15 μm<sup>2</sup> areas as well as PEDOT-maleimide over (b) 1×1, (d) 5×5, (f) 10×10, and (h) 15×15 μm<sup>2</sup> areas.



**Table S7.** Effective surface areas of PEDOT and PEDOT-maleimide at different probed length scales

| Sample          | $1 \times 1 \mu\text{m}^2$ |                               | $5 \times 5 \mu\text{m}^2$ |                               | $10 \times 10 \mu\text{m}^2$ |                               | $15 \times 15 \mu\text{m}^2$ |                               |
|-----------------|----------------------------|-------------------------------|----------------------------|-------------------------------|------------------------------|-------------------------------|------------------------------|-------------------------------|
|                 | Mean ( $\mu\text{m}^2$ )   | Deviation ( $\mu\text{m}^2$ ) | Mean ( $\mu\text{m}^2$ )   | Deviation ( $\mu\text{m}^2$ ) | Mean ( $\mu\text{m}^2$ )     | Deviation ( $\mu\text{m}^2$ ) | Mean ( $\mu\text{m}^2$ )     | Deviation ( $\mu\text{m}^2$ ) |
| PEDOT           | 1.30                       | 0.10                          | 33.33                      | 1.70                          | 137.00                       | 6.24                          | 322.67                       | 6.81                          |
| PEDOT-maleimide | 1.39                       | 0.05                          | 33.78                      | 2.04                          | 143.33                       | 14.57                         | 345.33                       | 17.21                         |

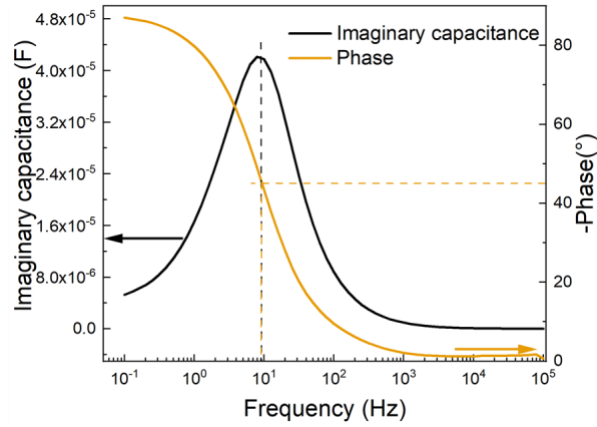

**Fig. S9** Evolution of imaginary capacitance and phase angle of PEDOT.

**Table S8.** Extracted relaxation time constants from PEDOT and PEDOT-maleimide samples from imaginary capacitance and phase curves built against the frequency

| Strategy                                  | Sample 1<br>(ms) | Sample 2<br>(ms) | Sample 3<br>(ms) | Average<br>(ms) | Standard<br>deviation (ms) |
|-------------------------------------------|------------------|------------------|------------------|-----------------|----------------------------|
| PEDOT phase                               | 108.1            | 108.1            | 108.1            | 108.1           | 0.0                        |
| PEDOT-maleimide<br>Phase                  | 90.0             | 106.3            | 74.9             | 90.4            | 15.7                       |
| PEDOT imaginary<br>capacitance            | 118.6            | 118.6            | 130.2            | 122.5           | 6.7                        |
| sPEDOT-maleimide<br>imaginary capacitance | 93.3             | 104.2            | 79.0             | 92.2            | 12.6                       |
